# Supplementary material for: Hepatitis B Virus (HBV), Hepatitis C Virus (HCV) and Human Immunodeficiency Virus (HIV) infections among undocumented migrants and uninsured legal residents in the Netherlands: A cross-sectional study, 2018–2019
Source: PubMed Central journal article supplement (PMC8555813; doi:10.1371/journal.pone.0258932), 2021-10-29
Supplement: pone.0258932.s002.pdf [file pone.0258932.s002.pdf]

Castor studienummer |\_|\_|\_|\_|\_|\_|\_|\_|

## Vragenlijst Deel A (mondelinge afname)

### 1. Bent u wel eens getest op hepatitis B, hepatitis C of hiv?

#### a. Hepatitis B

- Nee
- Weet ik niet
- Ja --> in welk jaar voor het laatst?  
|\_|\_|\_|\_| (jaartal)

Wat was de uitslag?

- Negatief (niet geïnfecteerd)
- Positief (geïnfecteerd)
- Weet ik niet

#### b. Hepatitis C

- Nee
- Weet ik niet
- Ja --> in welk jaar voor het laatst?  
|\_|\_|\_|\_| (jaartal)

Wat was de uitslag?

- Negatief (niet geïnfecteerd)
- Positief (geïnfecteerd)
- Weet ik niet

#### c. Hiv

- Nee
- Weet ik niet
- Ja --> in welk jaar voor het laatst?  
|\_|\_|\_|\_| (jaartal)

Wat was de uitslag?

- Weet ik niet
- Hiv negatief (geen hiv-infectie)
- Hiv positief (wel hiv-infectie)

Indien positief: Slikt u hiervoor medicijnen (hiv-remmers)?

- Nee, omdat.....
- Ja, nl.....

### 2. In welk land bent u geboren? .....

### 3. Bent u ooit buiten Nederland geopereerd?

*Het gaat om alle soorten operaties, óók operaties aan het gebit (tanden en kiezen), keizersneden, cosmetische operaties zoals een facelift of liposuctie, of kijkoperaties waarbij in de huid wordt gesneden.*

- Nee
- Weet ik niet
- Ja --> In welk(e) land(en) was dat en in welk jaar?

*Meerdere landen invullen als u operaties in verschillende landen heeft ondergaan.*

1. In .....(land) in |\_|\_|\_|\_| (jaartal)
2. In .....(land) in |\_|\_|\_|\_| (jaartal)

Castor studienummer |\_|\_|\_|\_|\_|\_|\_|\_|

**4. Hebt u ooit een bloedtransfusie gekregen?** *Bloedtransfusie is het toedienen via een infuus van bloed of bloedproducten.*

- Nee
- Weet ik niet
- Ja --> In welk land was dat, en in welk jaar? (bloedtransfusie in Nederland telt hier ook mee)  
*Als u meerdere malen een bloedtransfusie in hetzelfde land heeft gekregen, vul dan het jaar in van de eerste bloedtransfusie in dat land.*

1. In ..... (land) in |\_|\_|\_|\_| (jaartal)

2. In ..... (land) in |\_|\_|\_|\_| (jaartal)

**5. Voor zover u weet, had uw moeder een hepatitis B - of hepatitis C virusinfectie, of leverkanker?**

- Nee
- Ja, hepatitis B of C
- Ja, leverkanker
- Weet ik niet

**6. Zijn er (andere) personen in uw familie die leverkanker of hepatitis B of C hebben?**

*Meerdere antwoorden mogelijk*

- Nee
- Weet ik niet
- Ja, hepatitis B of C
- Ja, leverkanker

**7. Met welk geslacht hebt u seksueel contact?**

- Mannen
- Vrouwen
- Beiden
- Niet van toepassing

**8. Hebt u meer dan 3 seksuele partners gehad in het afgelopen half jaar?**

- Nee
- Ja

**9. Hebt u ooit betaald voor seks of hebben anderen u ooit betaald voor seks (met geld, goederen of onderdak)?**

- Nee, nooit
- Ja, ik heb wel eens betaald voor seks --> Gebeurde dat in de afgelopen 6 maanden?
  - Nee
  - Ja
- Ja, ik heb wel eens geld, goederen of onderdak gekregen voor seks --> Gebeurde dat in de afgelopen 6 maanden?
  - Nee
  - Ja

**10. Hebt u ooit wel eens drugs gespoten (geïnjecteerd)?**

- Nee
- Ja
