# Supplementary material for: Hepatitis B Virus (HBV), Hepatitis C Virus (HCV) and Human Immunodeficiency Virus (HIV) infections among undocumented migrants and uninsured legal residents in the Netherlands: A cross-sectional study, 2018–2019
Source: PubMed Central journal article supplement (PMC8555813; doi:10.1371/journal.pone.0258932), 2021-10-29
Supplement: pone.0258932.s004.pdf [file pone.0258932.s004.pdf]

## Vragenlijst B

1. Wat is uw geslacht?
  - Man
  - Vrouw
  - Anders
  
2. Wat is uw leeftijd?  
.....
  
3. Wat is de hoogste opleiding die u heeft gedaan?
  - geen school
  - basisschool
  - voortgezet onderwijs (middelbare school)
  - hogere schooling (zoals mbo, hbo of universiteit)
  
4. In welk soort huis verblijft u op dit moment? (meerdere antwoorden mogelijk)
  - BBB (Bed, Bad, Brood)
  - Vrienden/familie
  - Eigen huis (illegaal gehuurd)
  - Huis via een hulpverlenersorganisatie, zoals het Leger des Heils.
  - Ik leef op de straat
  - anders,.....
  
5. Wanneer bent u vertrokken uit uw land van herkomst?  
jaar: |\_|\_|\_|\_|
  
6. Sinds wanneer verblijft u in Nederland?  
jaar: |\_|\_|\_|\_|
  
7. Hoe bent u Nederland binnengekomen?
  - Met een toeristenvisum
  - Met een werkvisum
  - Met een studentenvisum
  - Als een asielzoeker (aanvraag is afgewezen)
  - Anders, .....
  
8. Leeft u op dit moment met andere personen in een huis?
  - Ja, met ..... personen (aantal)
  - Nee

Indien ja: Met wie woont u samen? (meerdere antwoorden mogelijk!)

  - Ik woon samen met mijn partner
  - Ik leef samen met mijn kinderen onder de 4 jaar
  - Ik leef samen met mijn kinderen tussen de 4 en 17 jaar
  - Ik leef samen met mijn kinderen, ouder dan 18 jaar
  - Ik woon samen met mijn ouders of schoonouders
  - Ik leef met anderen, namelijk .....
  
9. Bent u de afgelopen 6 maand voor meer dan 24 uur in het buitenland geweest?
  - Ja, namelijk in de volgende landen:
    - 1).....
    - 2).....
    - 3).....
  - Nee

Castor studienummer |\_|\_|\_|\_|\_|\_|\_|\_|

10. Bent u ooit opgenomen geweest of behandeld geweest in een buitenlands ziekenhuis?

- Ja, namelijk in de volgende landen en de volgende jaren:
  - 1) In.....(land) In ..... (jaar)
  - 2) In.....(land) In ..... (jaar)
  - 3) In.....(land) In ..... (jaar)
- Nee

11. Gebruikt u op dit moment antibiotica?

- Nee
  - Niet op dit moment, maar wel minder dan 3 maand geleden
  - Niet op dit moment, maar wel 3-6 maand geleden
  - Ik kan me niet herinneren wanneer ik voor het laatst antibiotica heb gebruikt (u kan stoppen met invullen van de vragenlijst)
  - Nooit gebruikt (u kunt stoppen)
- Ja

12. Als u de afgelopen 6 maand antibiotica hebt gebruikt, hoe vaak werd u antibiotica voorgeschreven de laatste 6 maand?

- 1 keer
- 2 keren
- 3 keren
- 4 keren
- 5 keren of meer
